# Supplementary material
Source: PubMed Central journal article supplement (PMC5985337)
Supplement: mmc1.pdf [file mmc1.pdf]

**The American Journal of Human Genetics, Volume 102**

**Supplemental Data**

**Identification of Misclassified ClinVar Variants**

**via Disease Population Prevalence**

**Naisha Shah, Ying-Chen Claire Hou, Hung-Chun Yu, Rachana Sainger, C. Thomas Caskey, J. Craig Venter, and Amalio Telenti**

## SUPPLEMENTAL FIGURES

Figure S1: Genetic risk in ACMG-59 conditions with additional P and LP sets

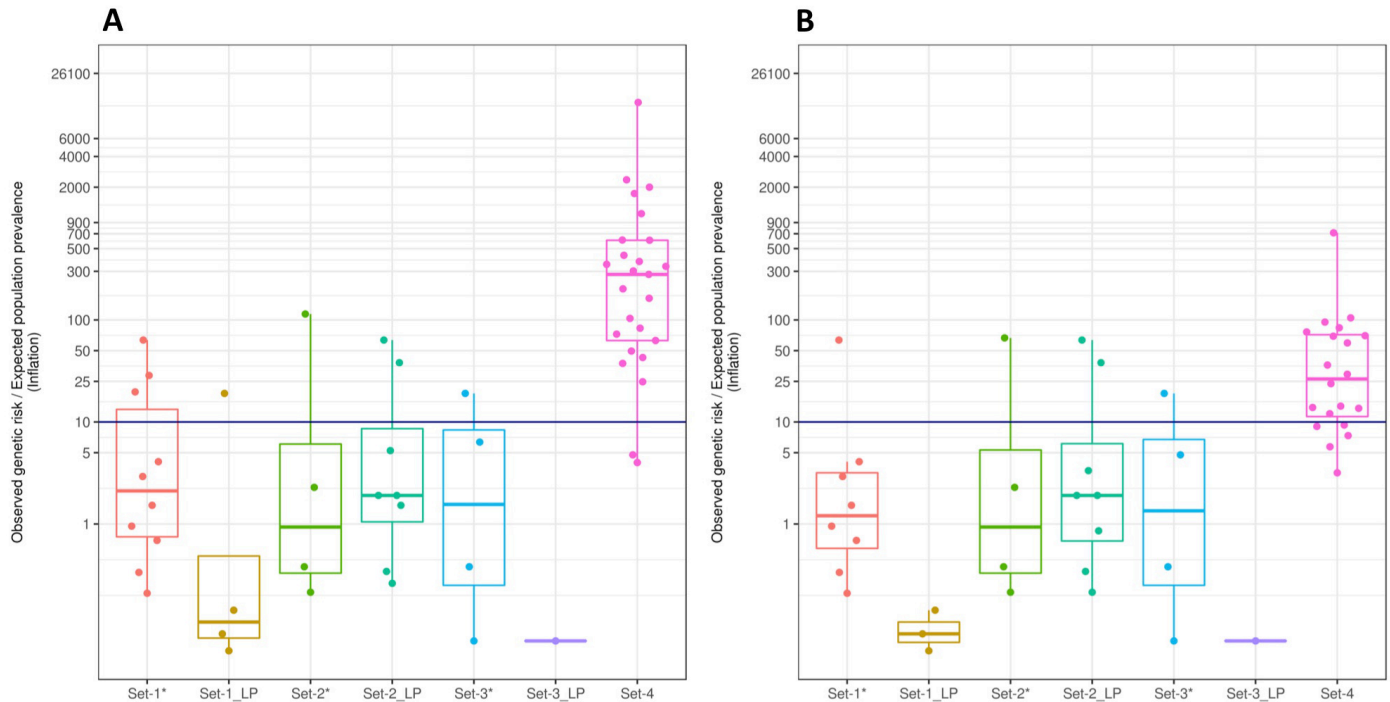

Fold-change of observed genetic risk over expected population prevalence using ClinVar variant sets for the ACMG-59 conditions. The observed genetic risk was calculated using the study population. Each point represents a condition; each condition may be represented in more than one set. The navy-blue line at a fold-change of 10 (i.e. inflation) indicates a theoretical penetrance of 10%. Observations above this line are highly suggestive of misclassified variants. A) Fold-change was calculated using variants per variant set: Set-1\* consists of pathogenic (P) variants with 2 or more ClinVar review stars (i.e. two or more submitters with assertion criteria, expert panel and practice guideline); Similarly, Set-1\_LP consists of LP variants. Set-2\* consists of P variants with 1 star (i.e. one submitter with assertion criteria); Similarly, Set-2\_LP consists of LP variants. Set-3\* consists of P variants with 0 star (i.e. submitter with no assertion criteria submitted in ClinVar); Similarly, Set-3\_LP consists of LP variants. Set-4 consists of variants with conflicting interpretations of pathogenicity. B) Fold-change was re-calculated after variants were filtered for disease-specific minor allele frequency thresholds.

Figure S2: Genetic risk in Orphanet conditions with additional P and LP sets

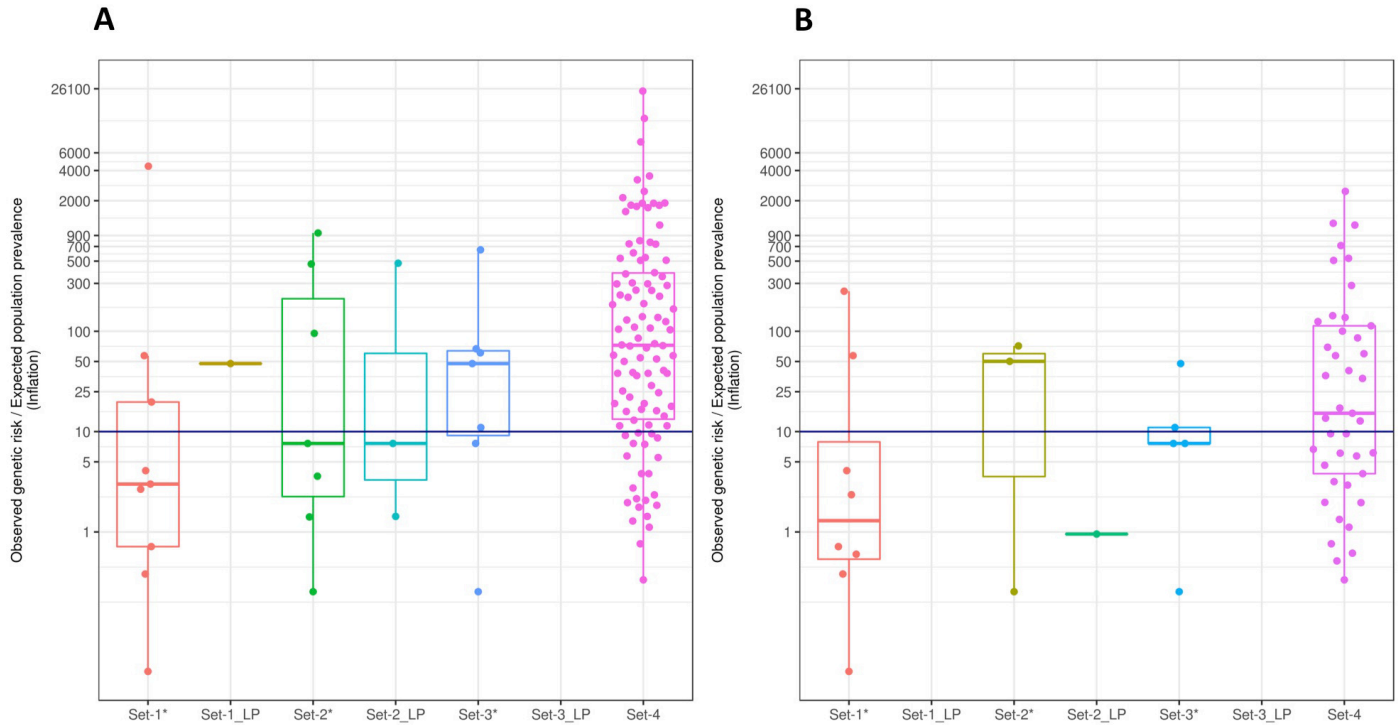

Fold-change of observed genetic risk over expected population prevalence using ClinVar variant sets for the Orphanet conditions. The observed genetic risk was calculated using the study population. Each point represents a condition; each condition may be represented in more than one set. The navy-blue line at a fold-change of 10 (i.e. inflation) indicates a theoretical penetrance of 10%. Observations above this line are highly suggestive of misclassified variants. A) Fold-change was calculated using variants per variant set: Set-1\* consists of pathogenic (P) variants with 2 or more ClinVar review stars (i.e. two or more submitters with assertion criteria, expert panel and practice guideline); Similarly, Set-1\_LP consists of LP variants. Set-2\* consists of P variants with 1 star (i.e. one submitter with assertion criteria); Similarly, Set-2\_LP consists of LP variants. Set-3\* consists of P variants with 0 star (i.e. submitter with no assertion criteria submitted in ClinVar); Similarly, Set-3\_LP consists of LP variants. Set-4 consists of variants with conflicting interpretations of pathogenicity. B) Fold-change was re-calculated after variants were filtered for disease-specific minor allele frequency thresholds.

Figure S3: Genetic risk in ACMG-59 conditions using gnomAD

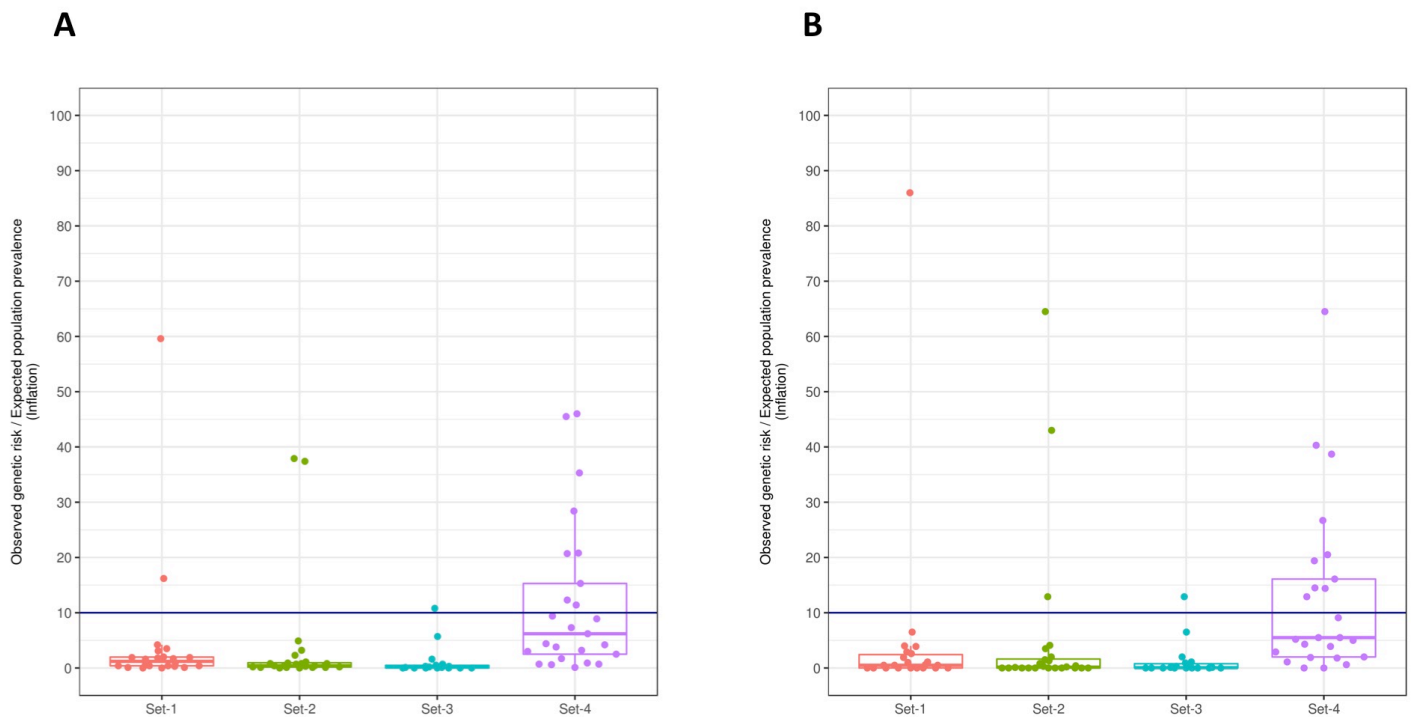

Fold-change of observed genetic risk over expected population prevalence using ClinVar variant sets for the ACMG-59 conditions. Each point represents a condition; each condition may be represented in more than one set. The navy-blue line at a fold-change of 10 (i.e. inflation) indicates a theoretical penetrance of 10%. Observations above this line are highly suggestive of misclassified variants. Fold-change was calculated using variants after disease-specific minor allele frequency filtering per variant set: Set-1 consists of variants with 2 or more ClinVar review stars (i.e. two or more submitters with assertion criteria, expert panel and practice guideline); Set-2 consists of variants with 1 star (i.e. one submitter with assertion criteria); Set-3 consists of variants with 0 star (i.e. submitter with no assertion criteria submitted in ClinVar); Set-4 consists of variants with conflicting interpretations of pathogenicity. A) The observed genetic risk was calculated using gnomAD exome data. B) The observed genetic risk was calculated using gnomAD genome data.

Figure S4: Genetic risk in Orphanet conditions using gnomAD

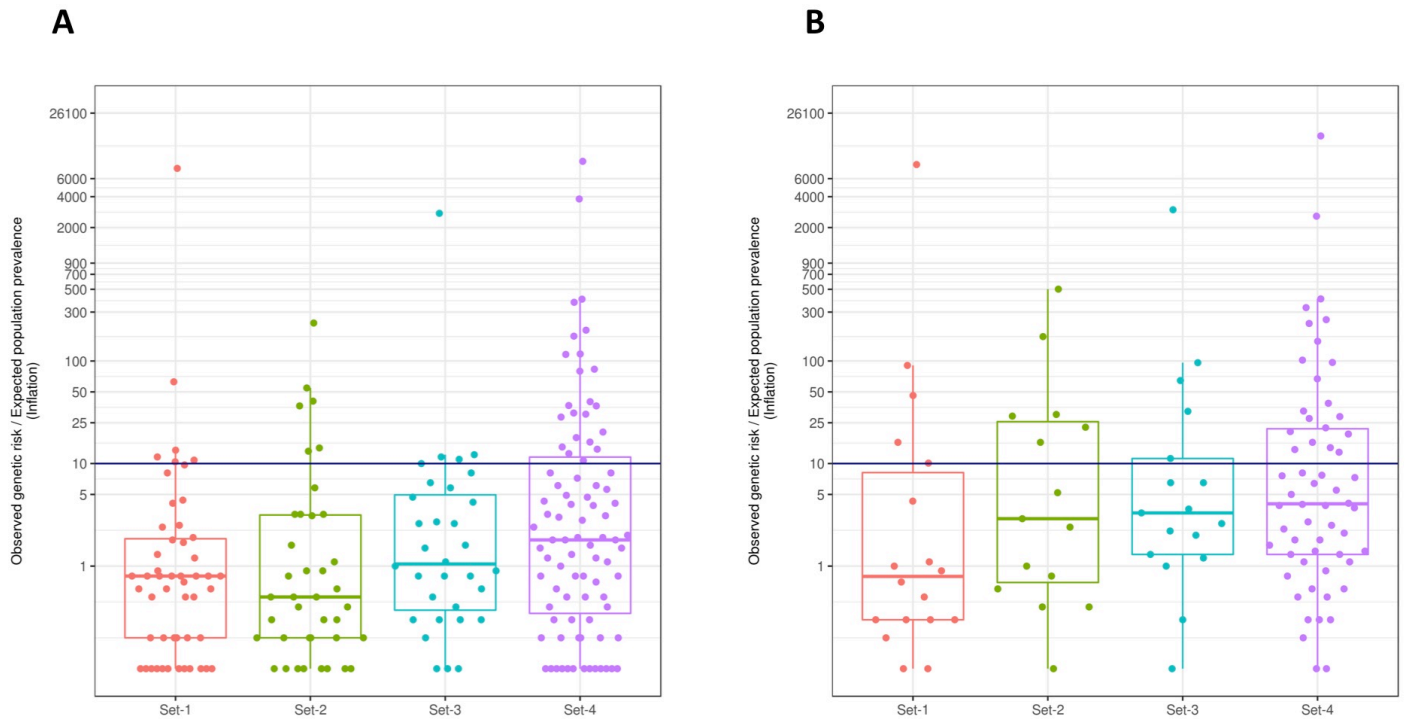

Fold-change of observed genetic risk over expected population prevalence using ClinVar variant sets for the Orphanet conditions. Each point represents a condition; each condition may be represented in more than one set. The navy-blue line at a fold-change of 10 (i.e. inflation) indicates a theoretical penetrance of 10%. Observations above this line are highly suggestive of misclassified variants. Fold-change was calculated using variants after disease-specific minor allele frequency filtering per variant set: Set-1 consists of variants with 2 or more ClinVar review stars (i.e. two or more submitters with assertion criteria, expert panel and practice guideline); Set-2 consists of variants with 1 star (i.e. one submitter with assertion criteria); Set-3 consists of variants with 0 star (i.e. submitter with no assertion criteria submitted in ClinVar); Set-4 consists of variants with conflicting interpretations of pathogenicity. A) The observed genetic risk was calculated using gnomAD exome data. B) The observed genetic risk was calculated using gnomAD genome data.

Figure S5: Number of ClinVar submitters for variants reclassified to conflicting interpretations of pathogenicity

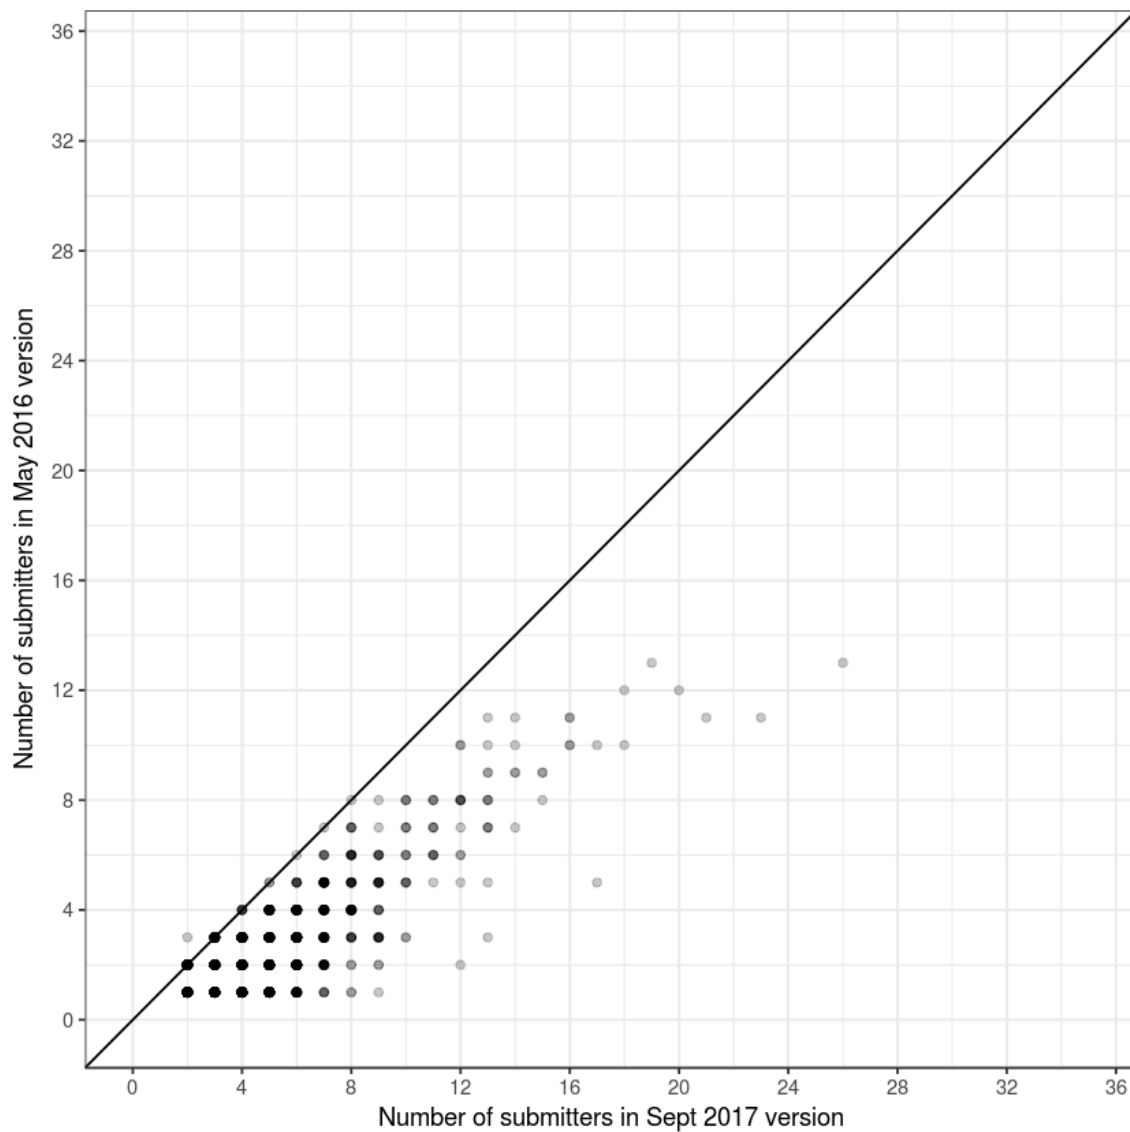

For 855 P/LP, 2525 VUS, and 2487 B/LB variants that changed its classification to conflicting interpretations of pathogenicity from May 2016 version of ClinVar to September 2017 version, the plot shows the number of ClinVar submitters.

## SUPPLEMENTAL TABLES

### Table S1: ClinVar variant sets

A list of ClinVar variant sets that was used in the study. The chromosomal positions are in GRCh38 human reference built. Provided as a separate excel file.

**Table S2: Genetic risk in ACMG-59 conditions.**

| Conditions                                            | Estimated Population Prevalence | Mode of Inheritance                       | Genes                                                                                      | Observed Genetic risk | Fold Change | Observed Genetic Risk (dMAF) | Fold Change (dMAF) |
|-------------------------------------------------------|---------------------------------|-------------------------------------------|--------------------------------------------------------------------------------------------|-----------------------|-------------|------------------------------|--------------------|
| Lynch Syndrome                                        | 227.27                          | Autosomal dominant                        | MLH1<br>MSH2<br>MSH6<br>PMS2                                                               | 105                   | 0.5         | 105                          | 0.5                |
| Familial hypercholesterolemia                         | 500                             | Autosomal dominant                        | APOB<br>LDLR<br>PCSK9                                                                      | 314                   | 0.6         | 314                          | 0.6                |
| Ehlers-Danlos syndrome, vascular type                 | 1                               | Autosomal dominant                        | COL3A1                                                                                     | 0                     | -           | 0                            | -                  |
| Familial adenomatous polyposis                        | 3.2                             | Autosomal dominant                        | APC                                                                                        | 0                     | -           | 0                            | -                  |
| Catecholaminergic polymorphic ventricular tachycardia | 10                              | Autosomal dominant                        | RYR2                                                                                       | 10                    | -           | 10                           | -                  |
| Ornithine transcarbamylase deficiency                 | 7.14                            | X-linked recessive                        | OTC                                                                                        | 10                    | -           | 10                           | -                  |
| Hypertrophic cardiomyopathy, Dilated cardiomyopathy   | 400                             | Autosomal dominant;<br>X-linked recessive | MYBPC3<br>MYH7<br>TNNT2<br>TNNI3<br>TPM1<br>MYL3<br>ACTC1<br>PRKAG2<br>MYL2<br>LMNA<br>GLA | 581                   | 1.5         | 562                          | 1.4                |
| WT1-related Wilms tumor                               | 10                              | Autosomal dominant                        | WT1                                                                                        | 19                    | 1.9         | 19                           | 1.9                |
| Arrhythmogenic right ventricular cardiomyopathy       | 100                             | Autosomal dominant                        | DSC2<br>DSG2<br>DSP<br>PKP2<br>TMEM43                                                      | 295                   | 3.0         | 229                          | 2.3                |
| Juvenile polyposis                                    | 6.25                            | Autosomal dominant                        | BMPR1A<br>SMAD4                                                                            | 0                     | -           | 0                            | -                  |
| Hereditary Breast and Ovarian Cancer                  | 250                             | Autosomal dominant                        | BRCA1<br>BRCA2                                                                             | 448                   | 1.8         | 448                          | 1.8                |



|                                                                                                                                                 |      |                     |                                                   |     |       |     |       |
|-------------------------------------------------------------------------------------------------------------------------------------------------|------|---------------------|---------------------------------------------------|-----|-------|-----|-------|
| MYH-Associated Polyposis; Adenomas, multiple colorectal, FAP type 2; Colorectal adenomatous polyposis, autosomal recessive, with pilomatricomas | 2.5  | Autosomal recessive | MUTYH                                             | 10  | -     | 10  | -     |
| Marfan Syndrome, Loews-Dietz Syndromes, and Familial Thoracic Aortic Aneurysms and Dissections                                                  | 20   | Autosomal dominant  | ACTA2<br>FBN1<br>MYH11<br>SMAD3<br>TGFB1<br>TGFB2 | 114 | 5.7   | 76  | 3.8   |
| Romano-Ward Long QT Syndromes Types 1, 2, and 3, Brugada Syndrome                                                                               | 50   | Autosomal dominant  | KCNH2<br>KCNQ1<br>SCN5A                           | 305 | 6.1   | 305 | 6.1   |
| Multiple Endocrine Neoplasia Type 1                                                                                                             | 3.3  | Autosomal dominant  | MEN1                                              | 0   | -     | 0   | -     |
| Li-Fraumeni Syndrome                                                                                                                            | 7    | Autosomal dominant  | TP53                                              | 48  | 6.8   | 48  | 6.8   |
| Retinoblastoma                                                                                                                                  | 6    | Autosomal dominant  | RB1                                               | 48  | 7.9   | 38  | 6.4   |
| Neurofibromatosis type 2                                                                                                                        | 1.78 | Autosomal dominant  | NF2                                               | 0   | -     | 0   | -     |
| Familial Medullary Thyroid Cancer (FMTC); Multiple Endocrine Neoplasia Type 2                                                                   | 2.9  | Autosomal dominant  | RET                                               | 57  | 19.7  | 10  | 3.3   |
| Peutz-Jeghers Syndrome                                                                                                                          | 2.2  | Autosomal dominant  | STK11                                             | 0   | -     | 0   | -     |
| PTEN Hamartoma Tumor Syndrome                                                                                                                   | 0.5  | Autosomal dominant  | PTEN                                              | 0   | -     | 0   | -     |
| Hereditary Paraganglioma-Pheochromocytoma Syndrome                                                                                              | 0.3  | Autosomal dominant  | SDHAF2<br>SDHB<br>SDHC<br>SDHD                    | 48  | 158.8 | 48  | 158.8 |
| Tuberous Sclerosis Complex                                                                                                                      | 17.2 | Autosomal dominant  | TSC1<br>TSC2                                      | 0   | -     | 0   | -     |
| Von Hippel Lindau syndrome                                                                                                                      | 2.3  | Autosomal dominant  | VHL                                               | 0   | -     | 0   | -     |
| Wilson disease                                                                                                                                  | 10   | Autosomal recessive | ATP7B                                             | 0   | -     | 0   | -     |
| Malignant hyperthermia susceptibility                                                                                                           | 1    | Autosomal dominant  | CACNA1S<br>RYR1                                   | 219 | 219.2 | 133 | 133.4 |

A list of ACMG-59 conditions with at least one P/LP variant from set-1, set-2 or set-3 observed in the study. The last two columns with “dMAF” suffix (“Observed Genetic risk (dMAF)” and “Fold Change (dMAF)”) are observed genetic risk and fold change calculated after filtering variants using disease-specific minor allele frequency (dMAF) filter. The population prevalence and genetic risk are calculated per 100,000. Fold change was not calculated if only one individual of the 10,495 samples was identified with genetic risk of the disease condition.

**Table S3: Genetic risk in Orphanet conditions.**

| Orphanet ID | Condition                                                  | Estimated Population Prevalence | Mode of Inheritance | Genes                                                                                                                     | Observed Genetic risk | Fold Change | Observed Genetic Risk (dMAF) | Fold Change (dMAF) |
|-------------|------------------------------------------------------------|---------------------------------|---------------------|---------------------------------------------------------------------------------------------------------------------------|-----------------------|-------------|------------------------------|--------------------|
| 48          | Congenital bilateral absence of vas deferens               | 50                              | Autosomal recessive | CFTR                                                                                                                      | 10                    | -           | 10                           | -                  |
| 55          | Oculocutaneous albinism                                    | 45                              | Autosomal recessive | OCA2                                                                                                                      | 10                    | -           | 10                           | -                  |
| 60          | Alpha-1-antitrypsin deficiency                             | 63.5                            | Autosomal recessive | SERPINA1                                                                                                                  | 191                   | 3.00        | 38                           | 0.60               |
| 122         | Birt-Hogg-Dubé syndrome                                    | 0.5                             | Autosomal dominant  | FLCN                                                                                                                      | 29                    | 57.17       | 29                           | 57.17              |
| 130         | Brugada syndrome                                           | 75                              | Autosomal dominant  | CACNA1C-AS1;CACNA1C ;CACNA1C-AS2;CACNA1C ;CACNA1C;CA CNA2D1;CACN B2;GPD1L;KC NE3;NSUN6;C ACNB2;SCN10 A;SCN3B;SCN5 A;TRPM4 | 38                    | 0.51        | 38                           | 0.51               |
| 145         | Hereditary breast and ovarian cancer syndrome              | 250                             | Autosomal dominant  | BRCA1;BRCA2                                                                                                               | 400                   | 1.60        | 353                          | 1.41               |
| 212         | Cystathioninuria                                           | 7.1                             | Autosomal recessive | CTH                                                                                                                       | 10                    | -           | 0                            | -                  |
| 232         | Sickle cell anemia                                         | 467.3                           | Autosomal recessive | HBB                                                                                                                       | 19                    | 0.04        | 19                           | 0.04               |
| 268         | Autosomal recessive limb-girdle muscular dystrophy type 2B | 0.13                            | Autosomal recessive | DYSF                                                                                                                      | 10                    | -           | 0                            | -                  |
| 282         | Frontotemporal dementia                                    | 3                               | Autosomal dominant  | CHMP2B;POU 1F1;MAPT                                                                                                       | 10                    | -           | 10                           | -                  |
| 287         | Ehlers-Danlos syndrome, classic type                       | 5                               | Autosomal dominant  | COL5A1;COL5 A2;LOC10144 8202;COL5A1                                                                                       | 10                    | -           | 10                           | -                  |
| 324         | Fabry disease                                              | 1.11                            | X-linked recessive  | RPL36A- HNRNP2;GL A                                                                                                       | 10                    | -           | 10                           | -                  |
| 325         | Congenital factor II deficiency                            | 0.05                            | Autosomal recessive | F2                                                                                                                        | 48                    | 952.83      | 0                            | -                  |
| 377         | Gorlin syndrome                                            | 5.3                             | Autosomal dominant  | LOC10050734 6;PTCH1;PTCH 1;PTCH2;SUFU                                                                                     | 19                    | 3.60        | 0                            | -                  |

|       |                                                               |      |                     |                       |      |         |     |        |
|-------|---------------------------------------------------------------|------|---------------------|-----------------------|------|---------|-----|--------|
| 429   | Hypochondroplasia                                             | 3.3  | Autosomal dominant  | FGFR3                 | 10   | -       | 10  | -      |
| 524   | Li-Fraumeni syndrome                                          | 7    | Autosomal dominant  | TP53                  | 29   | 4.08    | 29  | 4.08   |
| 558   | Marfan syndrome                                               | 20   | Autosomal dominant  | FBN1;TGFB2            | 29   | 1.43    | 19  | 0.95   |
| 565   | Menkes disease                                                | 2.5  | X-linked recessive  | ATP7A                 | 19   | 7.62    | 0   | -      |
| 586   | Cystic fibrosis                                               | 111  | Autosomal recessive | CFTR                  | 10   | -       | 10  | -      |
| 597   | Central core disease                                          | 0.4  | Autosomal dominant  | RYR1                  | 86   | 214.39  | 57  | 142.93 |
| 636   | Neurofibromatosis type 1                                      | 50   | Autosomal dominant  | NF1                   | 19   | 0.38    | 19  | 0.38   |
| 652   | Multiple endocrine neoplasia type 1                           | 3.3  | Autosomal dominant  | MEN1;RET              | 10   | -       | 10  | -      |
| 653   | Multiple endocrine neoplasia type 2                           | 2.9  | Autosomal dominant  | RET                   | 57   | 19.71   | 10  | -      |
| 661   | Ondine syndrome                                               | 0.5  | Autosomal dominant  | BDNF-AS;BDNF;GDNF;RET | 324  | 647.93  | 0   | -      |
| 676   | Hereditary chronic pancreatitis                               | 0.57 | Autosomal dominant  | CFTR;CTRC;SPINK1      | 2820 | 4948.05 | 172 | 300.90 |
| 758   | Pseudoxanthoma elasticum                                      | 2.5  | Autosomal recessive | ABCC6                 | 152  | 60.98   | 19  | 7.62   |
| 759   | Central precocious puberty                                    | 20   | Autosomal dominant  | KISS1R                | 152  | 7.62    | 0   | -      |
| 790   | Retinoblastoma                                                | 6    | Autosomal dominant  | RB1                   | 10   | -       | 10  | -      |
| 882   | Tyrosinemia type 1                                            | 54   | Autosomal recessive | FAH                   | 76   | 1.41    | 0   | -      |
| 1243  | Best vitelliform macular dystrophy                            | 20   | Autosomal dominant  | BEST1                 | 19   | 0.95    | 19  | 0.95   |
| 2152  | Mowat-Wilson syndrome                                         | 1.7  | Autosomal dominant  | ZEB2                  | 10   | -       | 10  | -      |
| 2337  | Non-epidermolytic palmoplantar keratoderma                    | 2.5  | Autosomal dominant  | AQP5                  | 19   | 7.62    | 19  | 7.62   |
| 2686  | Cyclic neutropenia                                            | 0.1  | Autosomal dominant  | ELANE                 | 10   | -       | 10  | -      |
| 3193  | Supravalvular aortic stenosis                                 | 13.3 | Autosomal dominant  | ELN                   | 10   | -       | 0   | -      |
| 32960 | Tumor necrosis factor receptor 1 associated periodic syndrome | 0.1  | Autosomal dominant  | TNFRSF1A              | 48   | 476.42  | 0   | -      |
| 44890 | Gastrointestinal stromal tumor                                | 14.5 | Autosomal dominant  | KIT;PDGFRA;SDHB;SDHC  | 19   | 1.31    | 19  | 1.31   |
| 79241 | Biotinidase deficiency                                        | 5    | Autosomal recessive | BTD                   | 10   | -       | 10  | -      |

|        |                                              |       |                     |                                          |    |       |    |       |
|--------|----------------------------------------------|-------|---------------------|------------------------------------------|----|-------|----|-------|
| 79432  | Oculocutaneous albinism type 2               | 46.15 | Autosomal recessive | OCA2                                     | 10 | -     | 10 | -     |
| 98672  | Autosomal dominant optic atrophy             | 83    | Autosomal dominant  | OPA1                                     | 10 | -     | 10 | -     |
| 98878  | Hemophilia A                                 | 19.3  | X-linked recessive  | F8                                       | 10 | -     | 10 | -     |
| 98879  | Hemophilia B                                 | 4     | X-linked recessive  | F9                                       | 10 | -     | 10 | -     |
| 100985 | Autosomal dominant spastic paraplegia type 4 | 0.91  | Autosomal dominant  | SPAST                                    | 10 | -     | 10 | -     |
| 101016 | Romano-Ward syndrome                         | 40    | Autosomal dominant  | KCNQ1                                    | 29 | 0.71  | 29 | 0.71  |
| 182090 | Pulmonary arterial hypertension              | 5.2   | Autosomal dominant  | BMPR2;ENG;L<br>OC102723566<br>;ENG;SMAD9 | 57 | 10.99 | 57 | 10.99 |

A list of Orphanet conditions with at least one P/LP variant from set-1, set-2 or set-3 observed in the study. The last two columns with “dMAF” suffix (“Observed Genetic risk (dMAF)” and “Fold Change (dMAF)”) are observed genetic risk and fold change calculated after filtering variants using disease-specific minor allele frequency (dMAF) filter. The population prevalence and genetic risk are calculated per 100,000. Fold change was not calculated if only one individual of the 10,495 samples was identified with genetic risk of the disease condition.
